# Supplementary material for: mBrain: towards the continuous follow-up and headache classification of primary headache disorder patients
Source: PubMed Central journal article supplement (PMC8969243; doi:10.1186/s12911-022-01813-w), 2022-03-31
Supplement: 12911_2022_1813_MOESM1_ESM.pdf [file 12911_2022_1813_MOESM1_ESM.pdf]

**Supplementary table 1** General statistics of data collection during the first mBrain data collection wave. Statistics mentioning “(pp)” are “per patient” statistics: they are first calculated per patient, and then aggregated over all patients. Other abbreviations used in this table: aut. is automatically added, man. is manually added, pct. is percentage, SD is standard deviation, pds. is periods, w/ is with, w/o is without, ‘#’ represents ‘number of’.

|                                                                                                                             | Wave 1          |
|-----------------------------------------------------------------------------------------------------------------------------|-----------------|
| # patients                                                                                                                  | 7               |
| Duration of trial (days) (pp), mean (SD)                                                                                    | 22.57 (1.62)    |
| Data collection statistics                                                                                                  |                 |
| Connected Empatica time per trial day (HH:mm) (pp), mean (SD)                                                               | 09:06 (03:54)   |
| # location points per trial day (pp), mean (SD)                                                                             | 91.49 (151.62)  |
| # tags per trial day (pp), mean (SD)                                                                                        | 0.41 (0.56)     |
| Timeline activity & interaction statistics                                                                                  |                 |
| Headache attacks                                                                                                            |                 |
| # headache attacks (pp), mean (SD)                                                                                          | 5.71 (4.68)     |
| Pct. of patients w/o any headache attack                                                                                    | 14.29%          |
| Medicine intakes                                                                                                            |                 |
| # medicine intakes (pp), mean (SD)                                                                                          | 3.86 (5.67)     |
| Pct. of patients w/o any medicine intake                                                                                    | 57.14%          |
| Activities                                                                                                                  |                 |
| # man. activities (pp), mean (SD)                                                                                           | 1.07 (0.46)     |
| # aut. activities per trial day (pp), mean (SD)                                                                             | 35.81 (12.71)   |
| Pct. of aut. activities of sedentary type (pp), mean (SD)                                                                   | 90.42% (3.47%)  |
| Pct. of aut. activities <i>fully</i> confirmed (pp), mean (SD)                                                              | 19.19% (26.72%) |
| Pct. of aut. activities <i>only</i> confirmed as sedentary, but w/o explicit confirmation of predicted type (pp), mean (SD) | 0.00% (0.00%)   |
| Pct. of aut. activities w/ <i>only</i> corrected time (pp), mean (SD)                                                       | 0.04% (0.08%)   |
| Pct. of aut. activities w/ corrected type (pp), mean (SD)                                                                   | 6.34% (6.83%)   |
| Pct. of aut. activities removed (pp), mean (SD)                                                                             | 3.22% (7.42%)   |
| Pct. of aut. activities ignored (pp), mean (SD)                                                                             | 71.20% (37.99%) |
| Sleep periods                                                                                                               |                 |
| # man. sleep pds. (pp), mean (SD)                                                                                           | 13.86 (5.70)    |
| # aut. sleep pds. (pp), mean (SD)                                                                                           | 31.57 (9.91)    |
| Pct. of aut. sleep pds. confirmed (pp), mean (SD)                                                                           | 6.11% (9.98%)   |
| Pct. of aut. sleep pds. w/ corrected time (pp), mean (SD)                                                                   | 0.48% (1.26%)   |
| Pct. of aut. sleep pds. corrected to activity (pp), mean (SD)                                                               | 0.00% (0.00%)   |
| Pct. of aut. sleep pds. removed (pp), mean (SD)                                                                             | 5.46% (8.33%)   |
| Pct. of aut. sleep pds. ignored (pp), mean (SD)                                                                             | 87.96% (16.08%) |
| Stress periods                                                                                                              |                 |
| # man. stress pds. per trial day (pp), mean (SD)                                                                            | 0.04 (0.08)     |
| # aut. stress pds. per trial day (pp), mean (SD)                                                                            | 15.86 (11.30)   |
| Pct. of aut. stress pds. confirmed w/o level (pp), mean (SD)                                                                | 2.63% (5.92%)   |
| Pct. of aut. stress pds. confirmed w/ level 1/2 (pp), mean (SD)                                                             | 1.48% (3.70%)   |
| Pct. of aut. stress pds. corrected w/ level 0 (pp), mean (SD)                                                               | 17.49% (29.45%) |
| Pct. of aut. stress pds. removed (pp), mean (SD)                                                                            | 5.00% (6.17%)   |
| Pct. of aut. stress pds. w/ corrected time (pp), mean (SD)                                                                  | 0.03% (0.07%)   |
| Pct. of aut. stress pds. ignored (pp), mean (SD)                                                                            | 73.37% (36.33%) |
| Daily record (DR) statistics                                                                                                |                 |
| Pct. of trial days w/ part of DR provided (pp), mean (SD)                                                                   | 78.89% (19.00%) |
| Pct. of trial days w/ daily stress level provided (pp), mean (SD)                                                           | 73.07% (25.05%) |
| Pct. of trial days w/ daily mood provided (pp), mean (SD)                                                                   | 73.66% (23.75%) |
| Pct. of trial days w/ daily food intake provided (pp), mean (SD)                                                            | 60.17% (28.33%) |
| Pct. of trial days w/ DR fully completed (pp), mean (SD)                                                                    | 58.87% (30.68%) |

**Supplementary table 2 General statistics of data collection during the second mBrain data collection wave. Statistics mentioning “(pp)” are “per patient” statistics: they are first calculated per patient, and then aggregated over all patients. Other abbreviations used in this table: aut. is automatically added, man. is manually added, pct. is percentage, SD is standard deviation, pds. is periods, w/ is with, w/o is without, ‘#’ represents ‘number of’.**

|                                                                                                                             | Wave 2          |
|-----------------------------------------------------------------------------------------------------------------------------|-----------------|
| # patients                                                                                                                  | 11              |
| Duration of trial (days) (pp), mean (SD)                                                                                    | 22.09 (0.30)    |
| Data collection statistics                                                                                                  |                 |
| Connected Empatica time per trial day (HH:mm) (pp), mean (SD)                                                               | 12:49 (04:49)   |
| # location points per trial day (pp), mean (SD)                                                                             | 109.78 (83.84)  |
| # tags per trial day (pp), mean (SD)                                                                                        | 0.89 (1.07)     |
| Timeline activity & interaction statistics                                                                                  |                 |
| Headache attacks                                                                                                            |                 |
| # headache attacks (pp), mean (SD)                                                                                          | 8.45 (3.14)     |
| Pct. of patients w/o any headache attack                                                                                    | 0.00%           |
| Medicine intakes                                                                                                            |                 |
| # medicine intakes (pp), mean (SD)                                                                                          | 5.64 (3.38)     |
| Pct. of patients w/o any medicine intake                                                                                    | 9.09%           |
| Activities                                                                                                                  |                 |
| # man. activities (pp), mean (SD)                                                                                           | 2.60 (1.77)     |
| # aut. activities per trial day (pp), mean (SD)                                                                             | 46.24 (16.16)   |
| Pct. of aut. activities of sedentary type (pp), mean (SD)                                                                   | 88.29% (6.22%)  |
| Pct. of aut. activities <i>fully</i> confirmed (pp), mean (SD)                                                              | 45.90% (30.46%) |
| Pct. of aut. activities <i>only</i> confirmed as sedentary, but w/o explicit confirmation of predicted type (pp), mean (SD) | 12.01% (14.83%) |
| Pct. of aut. activities w/ <i>only</i> corrected time (pp), mean (SD)                                                       | 0.56% (0.64%)   |
| Pct. of aut. activities w/ corrected type (pp), mean (SD)                                                                   | 5.31% (6.03%)   |
| Pct. of aut. activities removed (pp), mean (SD)                                                                             | 10.27% (8.31%)  |
| Pct. of aut. activities ignored (pp), mean (SD)                                                                             | 25.94% (33.73%) |
| Sleep periods                                                                                                               |                 |
| # man. sleep pds. (pp), mean (SD)                                                                                           | 19.45 (6.74)    |
| # aut. sleep pds. (pp), mean (SD)                                                                                           | 37.36 (13.17)   |
| Pct. of aut. sleep pds. confirmed (pp), mean (SD)                                                                           | 13.46% (13.16%) |
| Pct. of aut. sleep pds. w/ corrected time (pp), mean (SD)                                                                   | 2.62% (3.76%)   |
| Pct. of aut. sleep pds. corrected to activity (pp), mean (SD)                                                               | 0.70% (2.32%)   |
| Pct. of aut. sleep pds. removed (pp), mean (SD)                                                                             | 23.43% (28.16%) |
| Pct. of aut. sleep pds. ignored (pp), mean (SD)                                                                             | 59.79% (30.52%) |
| Stress periods                                                                                                              |                 |
| # man. stress pds. per trial day (pp), mean (SD)                                                                            | 0.05 (0.11)     |
| # aut. stress pds. per trial day (pp), mean (SD)                                                                            | 6.66 (2.84)     |
| Pct. of aut. stress pds. confirmed w/o level (pp), mean (SD)                                                                | 0.00% (0.00%)   |
| Pct. of aut. stress pds. confirmed w/ level 1/2 (pp), mean (SD)                                                             | 44.89% (32.41%) |
| Pct. of aut. stress pds. corrected w/ level 0 (pp), mean (SD)                                                               | 28.62% (28.03%) |
| Pct. of aut. stress pds. removed (pp), mean (SD)                                                                            | 2.66% (2.58%)   |
| Pct. of aut. stress pds. w/ corrected time (pp), mean (SD)                                                                  | 0.04% (0.14%)   |
| Pct. of aut. stress pds. ignored (pp), mean (SD)                                                                            | 23.79% (34.77%) |
| Daily record (DR) statistics                                                                                                |                 |
| Pct. of trial days w/ part of DR provided (pp), mean (SD)                                                                   | 92.99% (6.55%)  |
| Pct. of trial days w/ daily stress level provided (pp), mean (SD)                                                           | 91.34% (6.59%)  |
| Pct. of trial days w/ daily mood provided (pp), mean (SD)                                                                   | 91.34% (6.59%)  |
| Pct. of trial days w/ daily food intake provided (pp), mean (SD)                                                            | 87.62% (6.15%)  |
| Pct. of trial days w/ DR fully completed (pp), mean (SD)                                                                    | 87.62% (6.15%)  |
